# Supplementary material for: TMPRSS6 rs855791 Polymorphism Status in Children with Celiac Disease and Anemia
Source: MDPI journal article supplement (doi:10.3390/nu13082782), 2021-08-13
Supplement: s1 [file s1]

**Supplementary Table S1.** Haemoglobin levels to diagnose anemia [g/dL] (WHO recommendation) [1].

| Population                                        | Non-Anaemia | Anaemia   |          |        |
|---------------------------------------------------|-------------|-----------|----------|--------|
|                                                   |             | Mild      | Moderate | Severe |
| Children 6–59 months of age                       | ≥11.0       | 10.0–10.9 | 7.0–9.9  | <7.0   |
| Children 5–11 years of age                        | ≥11.5       | 11.0–11.4 | 8.0–10.9 | <8.0   |
| Children 12–14 years of age                       | ≥12.0       | 11.0–11.9 | 8.0–10.9 | <8.0   |
| Non-pregnant woman<br>(15 years of age and above) | ≥12.0       | 11.0–11.9 | 8.0–10.9 | <8.0   |
| Men<br>(15 years of age and above)                | ≥13.0       | 11.0–12.9 | 8.0–10.9 | <8.0   |

1. WHO. *Haemoglobin Concentrations for the Diagnosis of Anaemia and Assessment of Severity*; World Health Organization: Geneva, Switzerland, 2011; pp. 1–6.
